# Supplementary material for: In Vitro and In Vivo Comparison of Selected Ga-68 and Zr-89 Labelled Siderophores
Source: PubMed Central journal article supplement (PMC4870302; doi:10.1007/s11307-015-0897-6), 2015-09-30
Supplement: 11307_2015_897_MOESM1_ESM.pdf [file 11307_2015_897_MOESM1_ESM.pdf]

## Supplemental Material

### ***In Vitro and In Vivo Comparison of Selected Ga-68 and Zr-89 Labelled Siderophores***

**Journal: Molecular Imaging and Biology**

**Milos Petrik<sup>1</sup>, Chuangyan Zhai<sup>2</sup>, Zbynek Novy<sup>1</sup>, Lubor Urbanek<sup>3</sup>, Hubertus Haas<sup>4</sup> and  
Clemens Decristoforo<sup>2</sup>**

*<sup>1</sup>Institute of Molecular and Translational Medicine, Faculty of Medicine and Dentistry,  
Palacky University, Olomouc, Czech Republic*

*<sup>2</sup>Clinical Department of Nuclear Medicine, Medical University Innsbruck, Innsbruck, Austria*

*<sup>3</sup>Laboratory of Growth Regulators, Centre of the Region Hana for Biotechnological and  
Agricultural Research, Institute of Experimental Botany AS CR & Palacky University,  
Olomouc, Czech Republic*

*<sup>4</sup>Division of Molecular Biology/Biocenter, Medical University Innsbruck, Innsbruck, Austria*

Corresponding author:

Milos Petrik

Institute of Molecular and Translational Medicine, Hnevotinska 5, CZ-77900 Olomouc,  
Czech Republic

Email: [milospetrik@seznam.cz](mailto:milospetrik@seznam.cz)

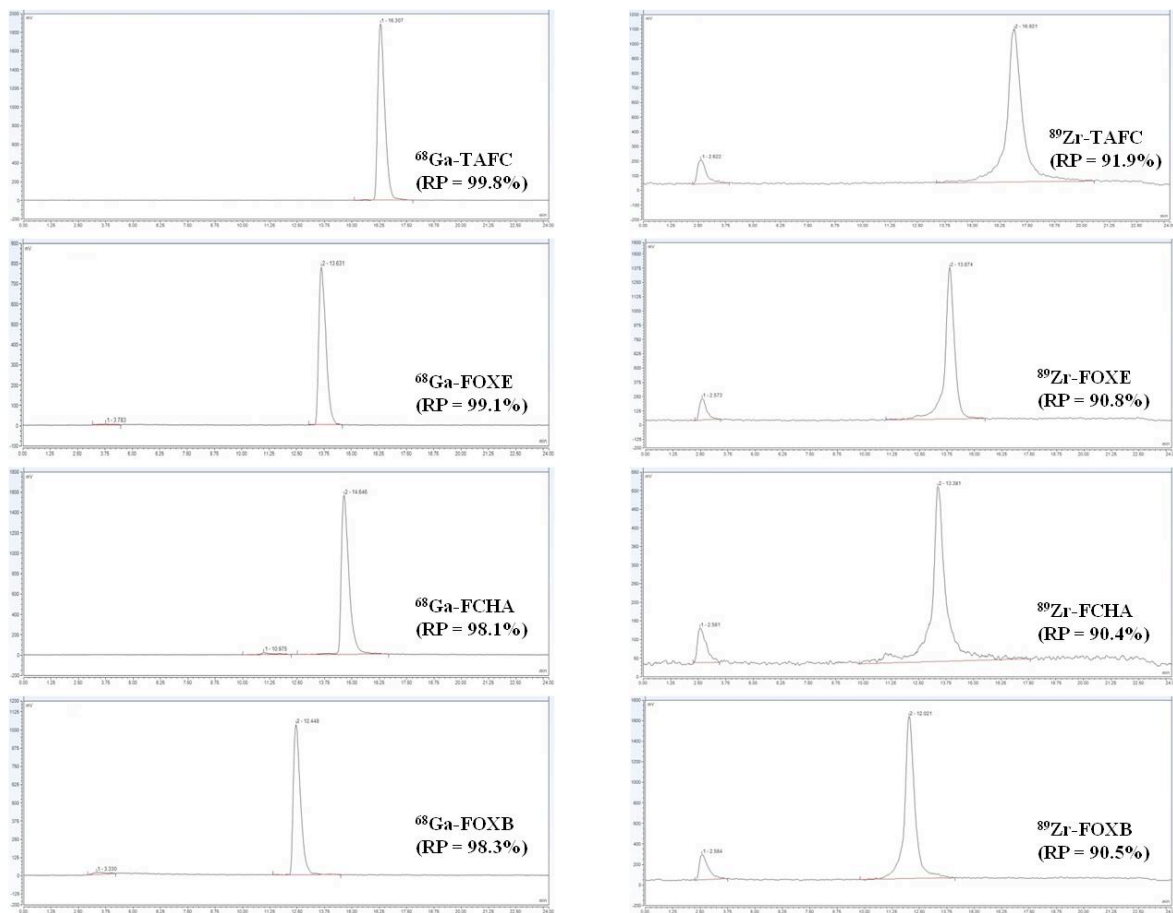

**Supplemental Fig. 1** Examples of high-performance liquid chromatography-radiochromatograms of studied siderophores with respective radiochemical purity (RP) in %.
